# Supplementary material for: Mental Health and Perceived Access to Care among People Who Inject Drugs in Athens, Greece
Source: MDPI journal article supplement (doi:10.3390/jcm10061181), 2021-03-12
Supplement: s1 [file s1]

**Table S1.** Questions (Q) and responses (R) of TRIP (Transmission Reduction Intervention Project) questionnaire related to mental health, stigma and social support experiences, and perceived access to care.

| <b>Psychological distress</b>   |                                                                                                                                                                                                                                                      |
|---------------------------------|------------------------------------------------------------------------------------------------------------------------------------------------------------------------------------------------------------------------------------------------------|
| <b>Depression</b>               |                                                                                                                                                                                                                                                      |
| Q1                              | Have you felt downhearted and blue?                                                                                                                                                                                                                  |
| Q2                              | Have you been moody or brooded about things?                                                                                                                                                                                                         |
| Q3                              | Have you been in low or very low spirits?                                                                                                                                                                                                            |
| R1-R3                           | (1) None of the time (2) A little of the time (3) Some of the time (4) A good bit of the time (5) Most of the time (6) All of the time                                                                                                               |
| Q4                              | Did you feel depressed during the past month?                                                                                                                                                                                                        |
| R4                              | (1) No, never felt depressed at all<br>(2) Yes, a little depressed now and then<br>(3) Yes, quite depressed several times<br>(4) Yes, very depressed almost every day<br>(5) Yes, to the point that I did not care about anything for days at a time |
| <b>Anxiety</b>                  |                                                                                                                                                                                                                                                      |
| Q5                              | Have you been a very nervous person?                                                                                                                                                                                                                 |
| Q6                              | Have you felt tense or "high-strung"?                                                                                                                                                                                                                |
| Q7                              | Have you felt restless, fidgety, or impatient?                                                                                                                                                                                                       |
| Q8                              | How often did you become nervous or jumpy when faced with excitement or unexpected situations during the past month?                                                                                                                                 |
| Q9                              | During the past month, how often did your hands shake when you tried to do something?                                                                                                                                                                |
| Q10                             | During the past month, how often did you get rattled, upset or flustered?                                                                                                                                                                            |
| Q11                             | How often during the past month did you find yourself trying to calm down?                                                                                                                                                                           |
| Q12                             | How much have you been bothered by nervousness, or your "nerves", during the past month?                                                                                                                                                             |
| Q13                             | During the past month, have you been anxious or worried?                                                                                                                                                                                             |
| R5-R13                          | (1) None of the time (2) A little of the time (3) Some of the time (4) A good bit of the time (5) Most of the time (6) All of the time                                                                                                               |
| <b>Psychological well-being</b> |                                                                                                                                                                                                                                                      |
| <b>General positive affect</b>  |                                                                                                                                                                                                                                                      |
| Q14                             | Have you felt that the future looks hopeful and promising?                                                                                                                                                                                           |
| Q15                             | Has your daily life been full of things that were interesting to you?                                                                                                                                                                                |
| Q16                             | Did you feel relaxed and free from tension?                                                                                                                                                                                                          |
| Q17                             | Have you generally enjoyed the things you do?                                                                                                                                                                                                        |
| Q18                             | Have you felt calm and peaceful?                                                                                                                                                                                                                     |
| Q19                             | Has living been a wonderful adventure for you?                                                                                                                                                                                                       |
| Q20                             | Have you felt cheerful, lighthearted?                                                                                                                                                                                                                |
| Q21                             | Were you a happy person?                                                                                                                                                                                                                             |

|                               |                                                                                                                                                                                  |
|-------------------------------|----------------------------------------------------------------------------------------------------------------------------------------------------------------------------------|
| Q22                           | When you have got up in the morning, this past month, about how often did you expect to have an interesting day?                                                                 |
| Q23                           | How often, during the past month, have you been waking up feeling fresh and rested?                                                                                              |
| R14-R23                       | (1) None of the time (2) A little of the time (3) Some of the time (4) A good bit of the time (5) Most of the time (6) All of the time                                           |
| <b>Stigma related to HIV</b>  |                                                                                                                                                                                  |
| Q24                           | In the last 6 months, has anyone made nasty comments to you because they thought you had recent HIV infection?                                                                   |
| Q25                           | In the last 6 months, has anyone threatened or physically attacked you because they thought you had recent HIV infection?                                                        |
| Q26                           | In the last 6 months, has anyone denied you access to goods or forbidden you to go somewhere because they thought you had recent HIV infection?                                  |
| Q27                           | In the last 6 months, has anyone excluded you from social gatherings or have you gotten invited to fewer social events because they thought you had recent HIV infection?        |
| R24-R27                       | (0) No (1) Yes                                                                                                                                                                   |
| <b>Social support for HIV</b> |                                                                                                                                                                                  |
| Q28                           | In the last 6 months, has anyone offered you emotional support because they thought you had recent HIV infection?                                                                |
| Q29                           | In the last 6 months, has anyone offered you any form of concrete assistance like money or food because they thought you had recent HIV infection?                               |
| Q30                           | In the last 6 months, has anyone offered you information about where you can get any HIV service /testing/ consultation, etc. because they thought you had recent HIV infection? |
| R28-R30                       | (0) No (1) Yes                                                                                                                                                                   |
| <b>Access to care</b>         |                                                                                                                                                                                  |
| Q31                           | I am able to get medical care whenever I need it.                                                                                                                                |
| Q32                           | It is hard for me to get medical care in an emergency.                                                                                                                           |
| Q33                           | Sometimes I go without the medical care I need because it is too expensive.                                                                                                      |
| Q34                           | I have easy access to the medical specialists that I need.                                                                                                                       |
| Q35                           | Places where I can get medical care are very conveniently located.                                                                                                               |
| R31-R35                       | (0) Strongly disagree (1) Somewhat disagree (2) Neither agree nor disagree (3) Somewhat agree (4) Strongly agree                                                                 |
